# Supplementary material
Source: PubMed Central journal article supplement (PMC7431030)
Supplement: NIHMS1587111-supplement-3.pdf [file NIHMS1587111-supplement-3.pdf]

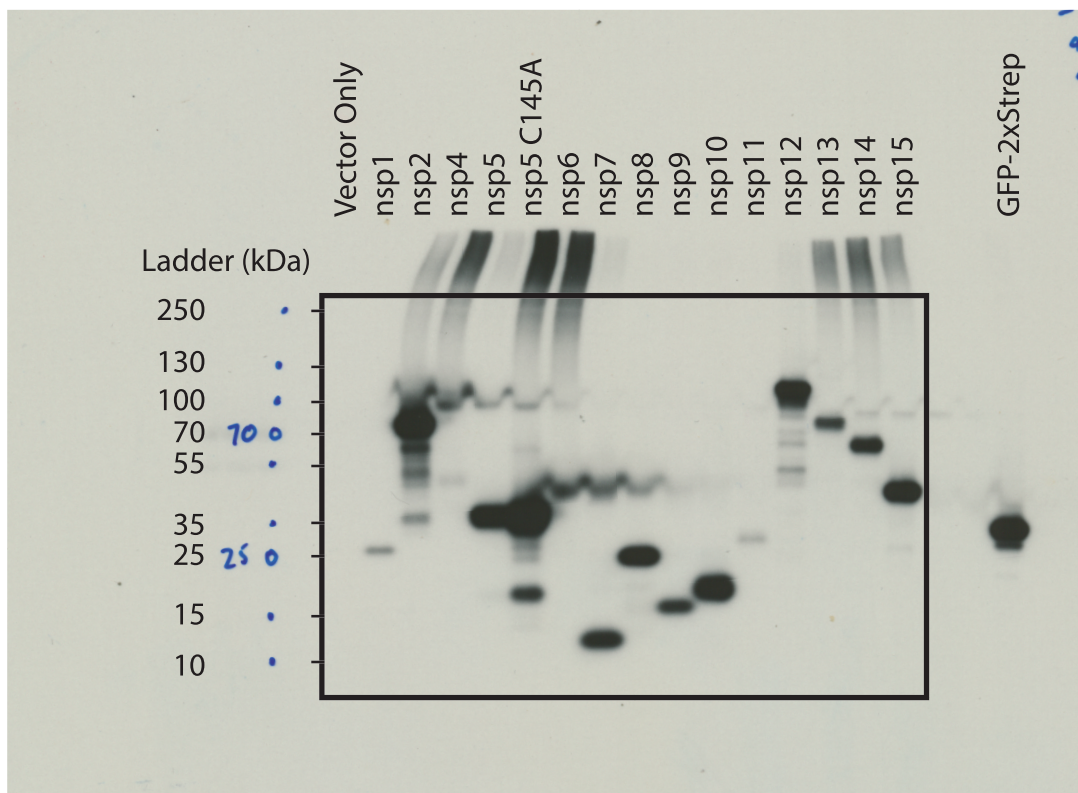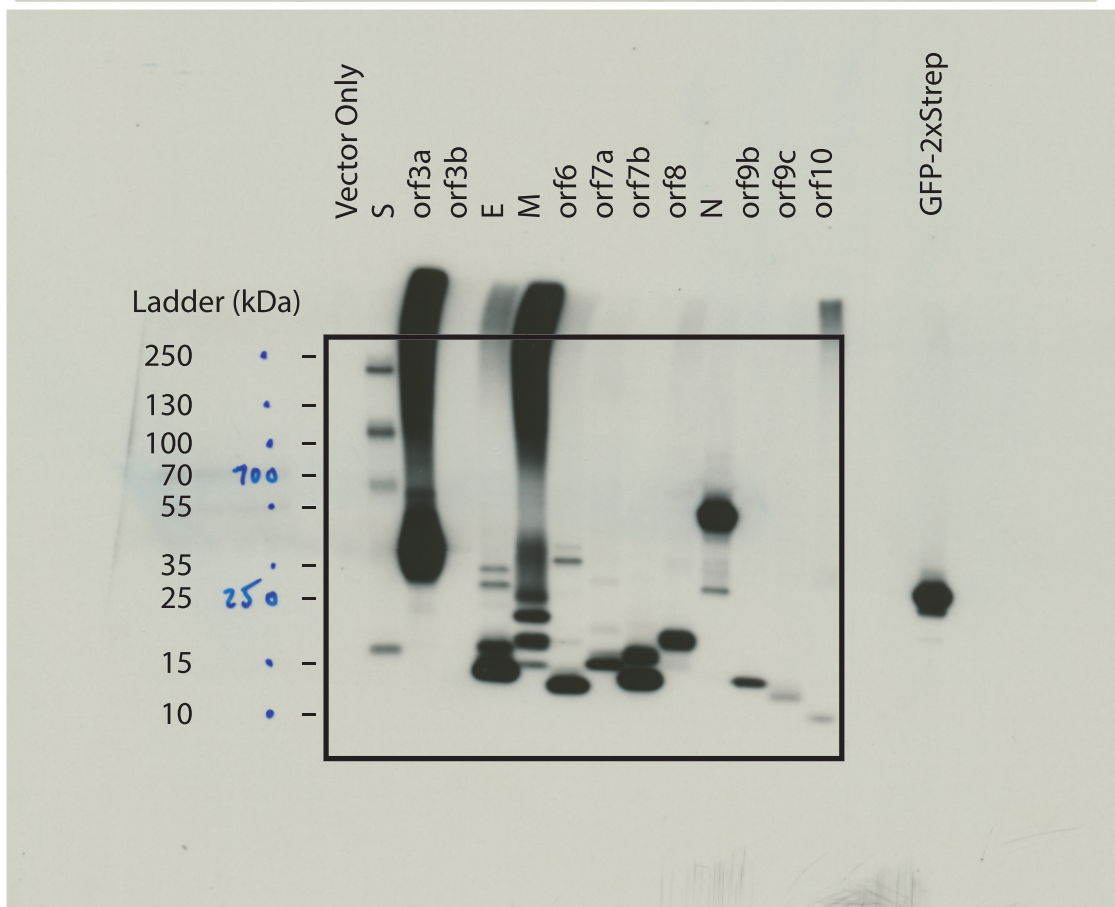

Supplementary Figure 1: Raw Western blot images with molecular weight ladder and black box outlining the image cropping used to generate Extended Data Figure 1b. Both blots were probed with primary antibody anti-streptavidin, Qiagen #34850 (1:2500); and secondary anti-mouse-HRP conjugate, BioRad #1706516 (1:20,000).
